# Supplementary material for: Activated Luffa derived biowaste carbon for enhanced desalination performance in brackish water
Source: Royal Society of Chemistry journal article supplement (doi:10.1039/c9ra01872g), 2019-01-01
Supplement: c9ra01872g1.pdf [file c9ra01872g1.pdf]

Supporting Information

# **Activated Luffa derived biowaste carbon for enhanced desalination performance in brackish water**

Deepa Sriramulu, Sareh Vafakhah and Hui Ying Yang\*

Pillar of Engineering Product Development,

Singapore University of Technology and Design, Singapore 487372

[yanghuiying@sutd.edu.sg](mailto:yanghuiying@sutd.edu.sg)

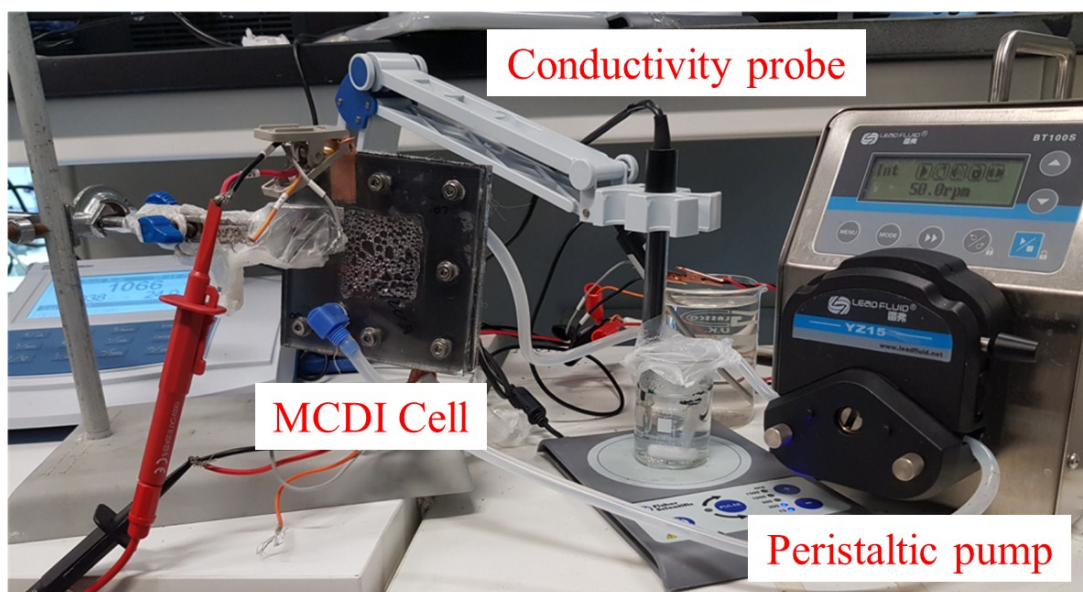

**Fig. S1** MCDI experimental setup.

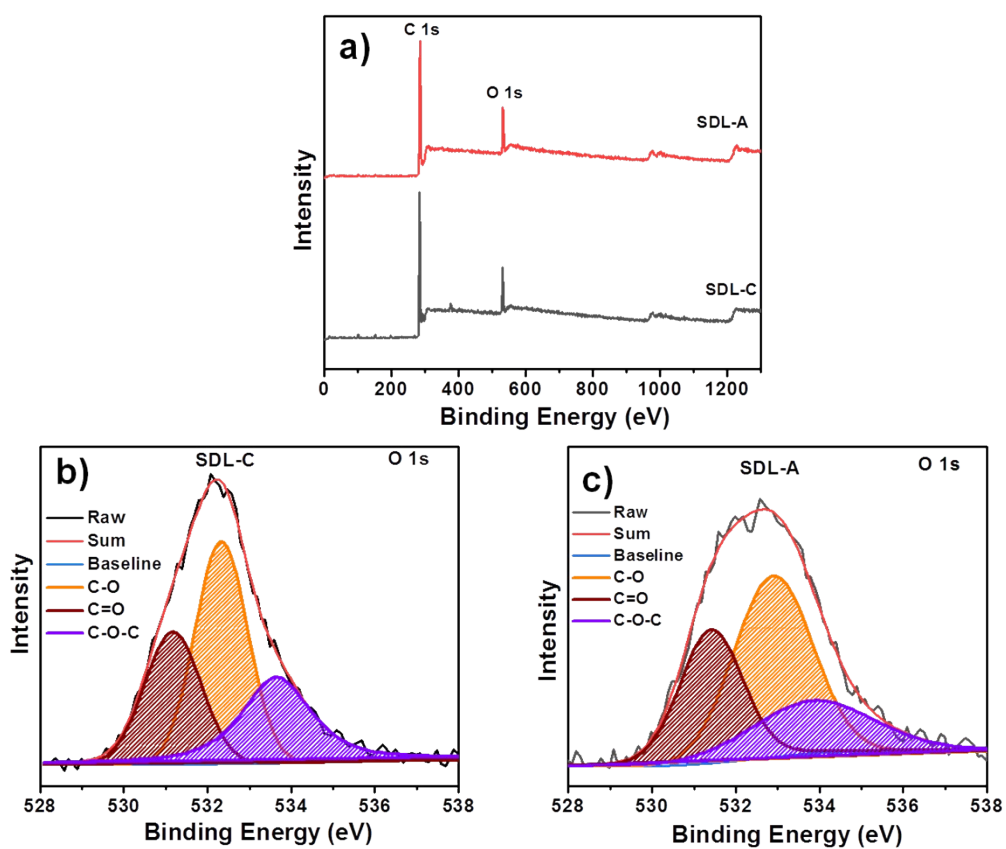

**Fig. S2** (a) Full scan XPS spectrum of SDL-C and SDL-A and High resolution spectra of O 1s for (b) SDL-C and (c) SDL-A.

**Table. S1** Parameters of electronics elements in the equivalent circuit in Figure 4a

| Sample | $R_e$ ( $\Omega$ ) | $R_{ct}$ ( $\Omega$ ) | $Z_w$ ( $\Omega$ ) |
|--------|--------------------|-----------------------|--------------------|
| SDL-C  | 6.001              | 61.9                  | 1.976              |
| SDL-A  | 1.457              | 4.129                 | 0.086              |

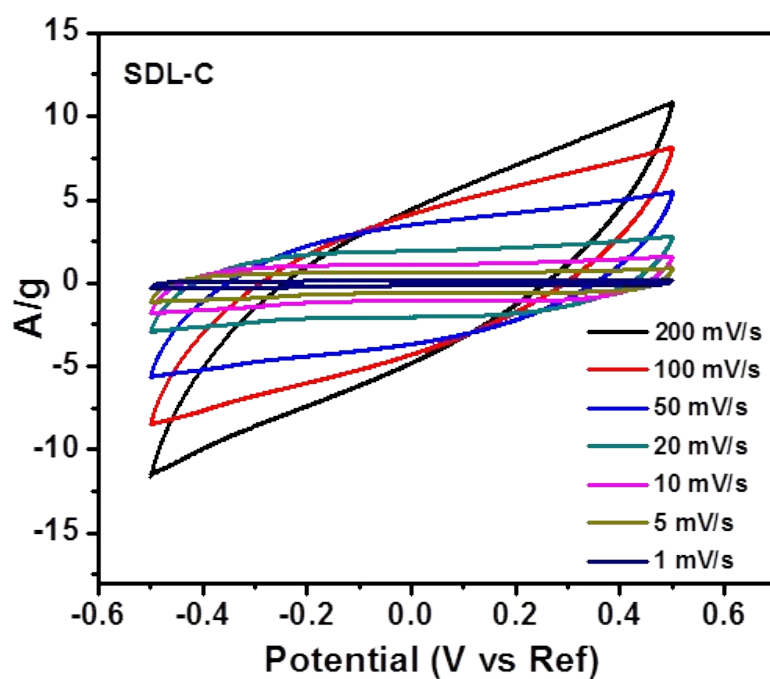

**Fig. S3** CV curves of SDL-C at a different scan rate from 1 mV to 200 mV/s, measured in a three-electrode system with 1M NaCl electrolyte solution.

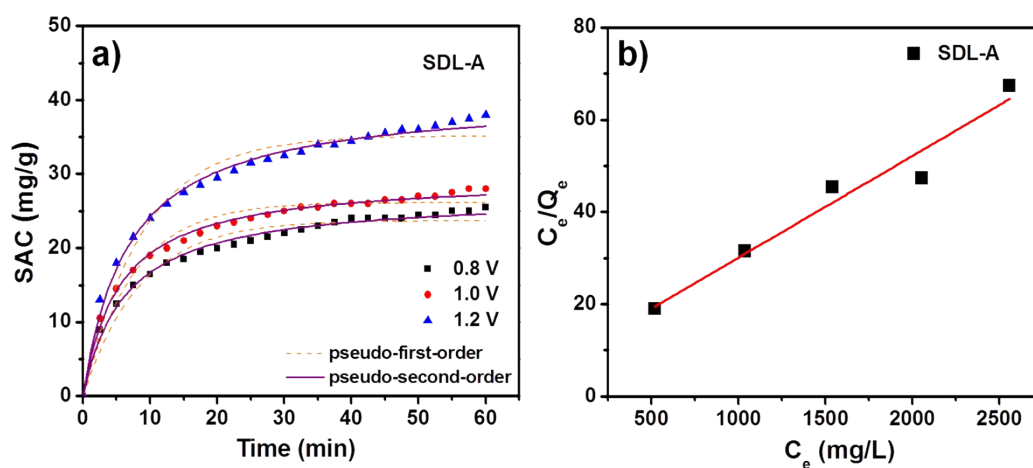

**Fig. S4.** (a) The electrosorption kinetics of NaCl onto the SDL-A electrodes at different voltages, and (b) Langmuir adsorption isotherm of NaCl onto the SDL-A at different equilibrium concentrations at 1.2 V.

**Table S2** Parameters of Langmuir isotherm study of SDL-A in 2500 mg/L NaCl solution at 1.2 V

| Sample          | $R_e$ ( $\Omega$ )                      |
|-----------------|-----------------------------------------|
| Linear equation | $Y = 0.02209x + 7.98835$                |
| Coefficients    | $q_m = 45$ mg/g,<br>$K_L = 0.0027$ L/mg |
| $R^2$           | 0.94234                                 |
